# Supplementary material for: Integrative characterization of the near‐minimal bacterium Mesoplasma florum
Source: PubMed Central journal article supplement (PMC7745072; doi:10.15252/msb.20209844), 2020-12-17
Supplement: MSB-16-e9844-s001.pdf [file MSB-16-e9844-s001.pdf]

# Appendix

## Integrative characterization of the near-minimal bacterium

### *Mesoplasma florum*

Dominick Matteau<sup>1</sup>, Jean-Christophe Lachance<sup>1</sup>, Frédéric Grenier<sup>1</sup>, Samuel Gauthier<sup>1</sup>, James M. Daubenspeck<sup>2</sup>, Kevin Dybvig<sup>2</sup>, Daniel Garneau<sup>1</sup>, Thomas F. Knight<sup>3</sup>, Pierre-Étienne Jacques<sup>1</sup>, & Sébastien Rodrigue<sup>1#</sup>.

<sup>1</sup>Département de biologie, Université de Sherbrooke, Sherbrooke, Québec, Canada.

<sup>2</sup>Department of Genetics, University of Alabama at Birmingham, Birmingham, Alabama, USA.

<sup>3</sup>Ginkgo Bioworks, Boston, Massachusetts, USA.

#Corresponding author. E-mail: [sebastien.rodrigue@usherbrooke.ca](mailto:sebastien.rodrigue@usherbrooke.ca)

Running title: *Mesoplasma florum* characterization

- 19 **This Appendix includes:**
- 20 Supplementary Materials and Methods
- 21 Supplementary Text
- 22 Supplementary Figures S1-S10
- 23 Supplementary Table S1
- 24 Supplementary References

## 25 **Supplementary Materials and Methods**

### 26 **Dry mass quantification**

27        Dry mass quantification of *M. florum* was performed in quadruplicate and repeated three  
28 times using 20 ml exponential-phase cultures. Briefly, cultures were centrifuged at 10°C for 15  
29 min at 7,900 x g, washed twice with cold PBS1X, and then transferred into microtubes pre-  
30 weighted using a Sartorius ME235P analytical scale. Microtubes containing cells were centrifuged  
31 at 10°C for 2 min at 21,100 x g and cell pellets were resuspended in PBS1X. Resuspended cells  
32 were then serially diluted in triplicate with PBS1X in a 96-well microplate and cell concentration  
33 was measured by flow cytometry (FCM) as described in the Growth kinetics assays section of  
34 Materials and Methods. Undiluted cell suspensions were then centrifuged at 10°C for 2 min at  
35 21,100 x g, supernatants were removed, and cell pellets were dried at 80°C for ~36 hrs. Dried cell  
36 pellets were then weighted using a Sartorius ME235P analytical scale. The *M. florum* dry mass per  
37 cell was determined by dividing the mass of the dried cell pellet by the total number of cells present  
38 in the sample measured by FCM.

### 39 **Protein mass quantification**

40        Protein mass quantification of *M. florum* was performed in quadruplicate by fluorescence-  
41 based protein quantification of whole-cell lysates. Briefly, whole-cell lysates were prepared by  
42 centrifuging exponential-phase *M. florum* cultures at 10°C for 15 min at 7,900 x g. Cells were  
43 washed twice with cold PBS1X, and then resuspended in PBS2X. Colony forming units (CFUs)  
44 were measured in triplicate by spotting serial dilutions of the samples on ATCC 1161 solid  
45 medium and counting colonies after an incubation of 24-48 hrs at 34°C. Sodium deoxycholate was  
46 then added to the cell suspensions to obtain a final concentration of 0.4% (w/v) in PBS1X, and

47 cells were lysed using a Bioruptor UCD-200 sonication system (Diagenode) set at high intensity  
48 and 4°C for 35 cycles (30 sec on, 30 sec off). Protein concentration was measured using the  
49 CBQCA Protein Quantitation Kit (Molecular Probes, C-6667) according to the manufacturer's  
50 specifications. Fluorescence was measured using a Synergy HT microplate reader (BioTek) with  
51 the 485/20 and 528/20 nm excitation and emission filters, respectively. The total mass of protein  
52 per cell was determined by dividing the protein concentration of the sample by the cell  
53 concentration measured by CFU counts.

#### 54 **DNA mass quantification**

55 DNA mass quantification of *M. florum* was performed in quadruplicate by fluorescence-  
56 based nucleic acid quantification of purified genomic DNA (gDNA). gDNA was extracted from  
57 exponential-phase *M. florum* cultures using the Zymo Quick-DNA MiniPrep Kit (Zymo Research,  
58 D3025) according to the manufacturer's specifications, with the exception that cells were sonicated  
59 in genomic lysis buffer using a Bioruptor UCD-200 sonication system (Diagenode) set at medium  
60 intensity and 4°C for 5 cycles (30 sec on, 30 sec off) prior to the column purification step. A  
61 purification control consisting of previously purified *M. florum* gDNA of known concentration  
62 (measured using Quant-iT PicoGreen dsDNA Assay Kit (Thermo Fisher Scientific, P7589)) was  
63 also performed in quadruplicate to evaluate purification efficiency. The DNA concentration of  
64 purified gDNA samples and controls was then measured by fluorescence-based quantification  
65 using the Quant-iT PicoGreen dsDNA Assay Kit (Thermo Fisher Scientific, P7589). Fluorescence  
66 was measured using a Synergy HT microplate reader (BioTek) with the 485/20 and 528/20 nm  
67 excitation and emission filters, respectively. The total mass of DNA per cell was determined by  
68 first normalizing the concentration of the purified *M. florum* gDNA by the purification efficiency,  
69 and then by dividing the normalized DNA concentration by the initial culture cell concentration

70 measured in triplicate by spotting serial dilutions on ATCC 1161 solid medium and counting  
71 colonies after an incubation of 24-48 hrs at 34°C.

## 72 **RNA mass quantification**

73 RNA mass per *M. florum* cell was quantified in quadruplicate as described in the Appendix  
74 DNA mass quantification section (see above), with the exception that cells were sonicated in  
75 QIAzol (QIAGEN) reagent, RNA was purified and treated with DNase I using the Direct-zol RNA  
76 MiniPrep Kit (Zymo Research, R2052), and RNA was quantified using Quant-iT RiboGreen RNA  
77 Assay Kit (Thermo Fisher Scientific, R11490) according to the manufacturer's specifications.

## 78 **Carbohydrate mass quantification and monosaccharide composition analysis**

79 The monosaccharide composition and mass quantification of *M. florum* carbohydrates was  
80 determined in quadruplicate by gas chromatography-mass spectrometry (GC-MS) performed on  
81 whole-cell lysates. Briefly, exponential-phase *M. florum* cultures were centrifuged at 10°C for 2  
82 min at 21,100 x g, and then washed twice with cold PBS1X. Cells were centrifuged again,  
83 resuspended in molecular grade water, and CFUs were evaluated in triplicate by spotting serial  
84 dilutions on ATCC 1161 solid medium and counting colonies after a 24-48 hrs incubation at 34°C  
85 (in triplicate). Resuspended cells were then lysed using a Bioruptor UCD-200 sonication system  
86 (Diagenode) set at high intensity and 4°C for 35 cycles (30 sec on, 30 sec off). Whole-cell lysates  
87 were then dried by vacuum centrifugation, resuspended in 400 µl of 1.45 N methanolic HCl, and  
88 treated at 80°C overnight to generate the methyl glycosides. The methanolic HCl was removed by  
89 vacuum centrifugation, and samples were resuspended in 200 µl of methanol, followed by the  
90 addition of 25 µl of acetic anhydride and 25 µl of pyridine. The mixture was allowed to react for  
91 30 min at room temperature and then evaporated under vacuum centrifugation. Samples were

92 sealed under argon and then trimethylsilylated using 50  $\mu$ l of Tri-Sil (Fisher). Samples were finally  
93 analyzed using a Varian GC-MS in the electron ionization mode. The monosaccharide composition  
94 and concentration were determined by comparison with known standards ran as a standard curve  
95 (Sigma-Aldrich), and normalized using the protein concentration of the analyzed samples. Protein  
96 concentration was calculated by multiplying the number of CFUs present in the cell resuspension  
97 before the lysis step by the total protein mass per cell evaluated previously (see Appendix Protein  
98 mass quantification section).

## 99 **Lipid mass quantification**

100 Lipid mass quantification of *M. florum* was performed in quadruplicate by fluorescence-  
101 based phospholipid quantification of whole-cell lysates. Whole-cell lysates were prepared as  
102 described in the Appendix Protein mass quantification section (see above). The phospholipid  
103 concentration of whole-cell lysates (molarity) was measured based on choline quantification using  
104 the Phospholipid Assay Kit (Sigma-Aldrich, MAK122) according to the manufacturer's  
105 specifications. Fluorescence was measured using a Synergy HT microplate reader (BioTek) with  
106 the 530/25 and 590/35 nm excitation and emission filters, respectively. The number of moles of  
107 choline-positive lipids per *M. florum* cell was calculated by dividing the measured concentration  
108 of whole-cell extracts by the cell concentration evaluated by CFU counts. The total mass of lipids  
109 per cell was then inferred based on the lipidomic profile of *M. florum* (see Dataset EV8 and Lipid  
110 mass spectrometry section). Briefly, identified lipid species were categorized as either choline-  
111 positive or choline-negative species (Fahy *et al*, 2009), and the average molecular weight of each  
112 category was calculated from the relative abundance and theoretical molecular weight of each  
113 included species. The number of moles of choline-negative lipids was then calculated according  
114 to the abundance fraction of each category (~47% and ~53%, respectively), and the total mass per

115 cell of choline-positive and choline-negative lipids was calculated by multiplying the number of  
116 moles of each category by their respective average molecular weight. The total lipid mass per  
117 *M. florum* cell was finally obtained by adding up the mass per cell of both lipid categories.

## 118 **Lipid mass spectrometry**

119 The lipid composition of *M. florum* was determined by direct infusion-tandem mass  
120 spectrometry (DI-MS/MS). Sample preparation and analysis was executed by PhenoSwitch  
121 Bioscience (Sherbrooke, Canada). Briefly, an exponential-phase *M. florum* culture was  
122 centrifuged at 10°C for 2 min at 21,100 x g and washed three times with cold electroporation buffer  
123 (272 mM sucrose, 1 mM HEPES [pH 7.4]). Cells were centrifuged again, the supernatant was  
124 discarded, and lipids were extracted from the cell pellet by liquid-liquid extraction. Cells were  
125 resuspended in 640 µl of ethanol, vortexed for 10 min, and 320 µl of chloroform was added  
126 (ethanol/chloroform 2:1 [v/v]). The mixture was vortexed again for 10 min and the insoluble  
127 material was removed by centrifugation. The supernatant was transferred into a new microtube,  
128 400 µl of water was added, and the mixture was vortexed for 10 min. Phases were separated by  
129 centrifugation and the bottom phase was transferred into a new microtube and washed with 500 µl  
130 of chloroform/methanol/water 3:48:47 (v/v/v). The washed bottom phase was then dried and  
131 reconstituted in a 1:1 dichloromethane/methanol solution containing 2 mM ammonium acetate,  
132 diluted 10 fold, and analyzed on a TripleTOF 5600 mass spectrometer (SCIEX) by direct sample  
133 infusion (25 µl) in the mobile phase (1:1 dichloromethane/methanol, 2 mM ammonium acetate).  
134 Lipids were analyzed in positive and negative modes using a MS/MS all method (1 m/z windows).  
135 Lipid species were identified using LipidView version 1.2 (SCIEX). Only species belonging to the  
136 confirmed and common lipid group with an abundance of at least 5% relative to the most abundant

137 identified species were considered significant and used in the determination of the total lipid mass  
138 per cell (see Dataset EV8).

### 139 **Description of cell mass equations**

140 Given a spherical *M. florum* cell with a certain diameter (d), its cell mass (CM) can be  
141 described as the product of its volume (V) and its buoyant density (D):

$$142 \quad CM = V \times D \quad (A. 1)$$

143 Since the volume of a sphere (V) with a certain diameter (d) is given by the following equation:

$$144 \quad V = \frac{\pi d^3}{6} \quad (A. 2)$$

145 The cell mass (CM) of *M. florum* can thus be described as follows:

$$146 \quad CM = \frac{\pi d^3}{6} \times D \quad (A. 3)$$

147 Alternatively, the mass of a cell (CM) can also be expressed as the ratio of its dry mass (DM) and  
148 its dry mass fraction (DF), the latter given by subtracting the water mass fraction (WF) of a cell  
149 from its total mass fraction, i.e. 1:

$$150 \quad CM = \frac{DM}{DF} \quad (A. 4)$$

151 or

$$152 \quad CM = \frac{DM}{1 - WF} \quad (A. 5)$$

153 If we separate the dry mass (DM) of a spherical cell from its water content, then the cell mass  
154 (CM) can be written as the cell volume (V) minus the volume occupied by its dry mass ( $V_{DM}$ ), to



155 which we multiply the density of water (approximated to 1.00 g/ml) and finally add the said dry  
156 mass (DM):

$$157 \quad CM = (V - V_{DM}) \times 1 + DM \quad (A. 6)$$

158 Since the dry mass volume ( $V_{DM}$ ) can be particularly difficult to measure, this variable can be  
159 substituted by the ratio of the dry mass (DM) and its specific density ( $D_{DM}$ ), which gives the  
160 following equation:

$$161 \quad CM = \left( V - \frac{DM}{D_{DM}} \right) \times 1 + DM \quad (A. 7)$$

162 Or, if we develop the cell volume (V) as given by equation A.2:

$$163 \quad CM = \left( \frac{\pi d^3}{6} - \frac{DM}{D_{DM}} \right) \times 1 + DM \quad (A. 8)$$

164 Conversely, if we replace the cell dry mass (DM) in equation A.4 by the product of its volume  
165 ( $V_{DM}$ ) and its specific density ( $D_{DM}$ ), we obtain:

$$166 \quad CM = \frac{D_{DM} \times V_{DM}}{DF} \quad (A. 9)$$

167 From this formula, the dry mass volume ( $V_{DM}$ ) can be isolated and substituted in equation A.6:

$$168 \quad V_{DM} = \frac{CM \times DF}{D_{DM}} \quad (A. 10)$$

169 and

$$170 \quad CM = \left( V - \frac{CM \times DF}{D_{DM}} \right) \times 1 + DM \quad (A. 11)$$

171 Finally, we can substitute one of the cell mass (CM) of equation A.11 by the cell mass expression  
172 of equation A.3 and develop the cell volume (V) as in equation A.2, which generates a formula  
173 unifying the *M. florum* cell diameter (d), buoyant density (D), dry mass fraction (DF), total dry  
174 mass (DM), and dry mass specific density ( $D_{DM}$ ):

$$175 \quad CM = \left( \frac{\pi d^3}{6} - \frac{\frac{\pi d^3}{6} \times D \times DF}{D_{DM}} \right) \times 1 + DM \quad (A.12)$$

## 176 **5'-RACE reads analysis**

177 Genome-wide 5'-rapid amplification of cDNA ends (5'-RACE) reads were first trimmed  
178 for quality using Trimmomatic version 0.32 (Bolger *et al*, 2014) and aligned on *M. florum* L1  
179 genome (NC\_006055.1) with Bowtie 2 version 2.3.3.1 (Langmead & Salzberg, 2012). A summary  
180 of the 5'-RACE library statistics is shown in Appendix Table S1. Reads with a MAPQ below 10  
181 were discarded using samtools version 1.5 (Li *et al*, 2009), and the remaining reads were clipped  
182 to retain only a single base at their 5' extremity, corresponding to putative 5'-end of transcripts.  
183 The strand-specific coverage at each genomic position was calculated and normalized according  
184 to the number of millions of mapped reads using Bedtools genomecov version 2.27.1 (Quinlan &  
185 Hall, 2010), resulting in RSPM values. 5'-RACE peaks with a RSPM signal equal or higher than  
186 the average plus one standard deviation single base signal calculated over the entire genome  
187 ( $\geq 10.92$ , obtained using 1 kb windows sliding over 100 bp) were considered significant and kept  
188 for further analysis (1514 peaks). Significant peaks located at 10 bp or less of each other were  
189 merged to retain only the peak with the highest associated RSPM signal, corresponding to a  
190 putative transcription start site (TSS). A total of 605 putative TSSs were identified. Promoter  
191 motifs were searched by extracting the DNA sequence surrounding each putative TSS (-45 to +5

192 bp relative coordinates) and submitting it to MEME version 5.0.3 (Bailey & Elkan, 1994) using  
193 the zero or one motif per sequence option with a minimum motif length of 40 bp. The presence of  
194 promoter motifs nearby significant 5'-RACE peaks was further analyzed using MAST version  
195 5.0.3 (Bailey & Gribskov, 1998) and the identified MEME motif to validate MEME hits and  
196 recover putative TSSs potentially lost through the merging procedure. Only MAST hits separated  
197 by 3 to 9 bp from a significant peak were kept. This resulted in the addition of eight putative TSSs  
198 to the 605 initially identified. To circumvent the misalignment of reads at the chromosome start  
199 position, the 5'-RACE reads were realigned on the L1 chromosome sequence linearized at position  
200 397,159 instead of 0, and the whole analysis procedure was repeated. This allowed us to identify  
201 an additional TSS located in the intergenic region upstream the *dnaA* gene (*peg.1/mfl001*). This  
202 TSS was added to Dataset EV1 and considered for transcription units reconstruction.

## 203 204 **Supplementary Text**

### 205 **Genetic context of gTSSs and iTSSs**

206 In total, 432 different motif-associated TSSs were identified by 5'-RACE (see Dataset  
207 EV1). 337 of them were located within intergenic regions of the chromosome (gTSSs). Intergenic  
208 regions can be divided into three types according to the topology of the neighbouring genes;  
209 divergent, convergent, and parallel (Fig. EV3A). Overall, intergenic regions containing gTSSs  
210 were significantly larger than those without any gTSS (Fig. EV3B). Most of gTSSs (71.5%) were  
211 comprised within parallel intergenic regions as they constitute the most abundant type present in  
212 the genome (Fig. EV3C). Conversely, only one case of gTSS was observed in convergent  
213 intergenic regions (0.3%), the rest of gTSSs being located within divergent counterparts (28.2%).  
214 Nonetheless, divergent intergenic regions most frequently contained gTSSs (96.2%) relative to

215 their total number of instances in the genome (Fig. EV3D). In contrast, only about half (43.5%) of  
216 the parallel intergenic regions contained at least one gTSS. As expected, divergent intergenic  
217 regions positive for gTSSs contained most of the time two instances per region, generally disposed  
218 back-to-back (Fig. EV3E). Remarkably, these sometimes displayed two overlapping -10 promoter  
219 boxes (Fig. EV3F). In comparison, more than 95% of positive parallel regions showed only a  
220 single gTSS occurrence (Fig. EV3E).

221         The remaining motif-associated TSSs (95 out of 432) were positioned within predicted  
222 coding regions of the chromosome (iTSSs). In total, 86 out of 720 *M. florum* genes were shown to  
223 contain motif-associated iTSSs (Fig. EV3D), with one iTSS per gene in more than 90% of all  
224 instances (Fig. EV3E). iTSSs can be separated in two distinct groups based on the orientation of  
225 the gene in which they are located: p-iTSSs, same orientation; a-iTSSs, opposite orientation  
226 (Fig. EV4A). The majority of motif-associated iTSSs identified in this study consisted of p-iTSSs  
227 (71 out of 95), a-iTSSs representing only 5.6% of all TSSs (24 out of 433) (Fig. 3D). iTSSs can be  
228 further categorized according to the orientation of the most immediate downstream gene, i.e.  
229 whether or not a gene is appropriately oriented to be expressed from a given iTSS (Fig. EV4A).  
230 Interestingly, most p-iTSSs were located upstream of genes transcribed on the same strand,  
231 contrasting with a-iTSSs predominantly facing their nearest downstream gene (Fig. EV4B). p-  
232 iTSSs were also found to be enriched near the end of their overlapping gene, suggesting that they  
233 could be involved in the transcription of downstream genes (Fig. EV4C). In fact, several instances  
234 of p-iTSSs separated by less than 100 bp from the next correctly oriented downstream gene could  
235 be observed (see Fig. EV4D for a visual example). Curiously, a total of nine p-iTSS (out of 71)  
236 were also precisely located on the first base of translation start codons, suggesting the transcription  
237 of leaderless mRNA (Fig. EV4C). A visual example of such as case is presented in Figure EV4E.

238 **Supplementary Figures**

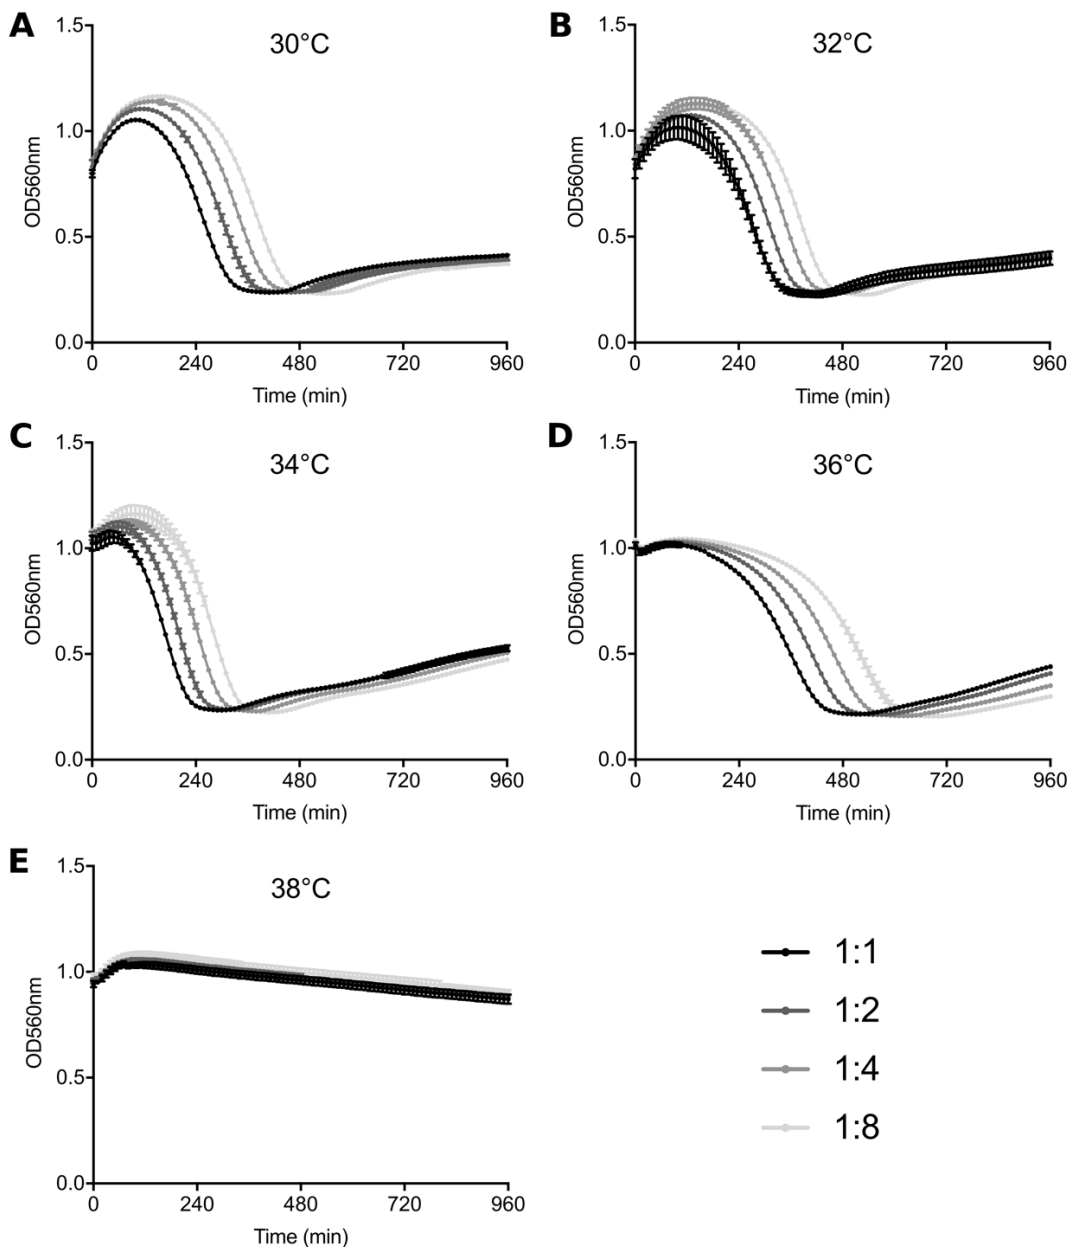

239

240 **Figure S1.** Raw growth curves (OD<sub>560nm</sub>) of colorimetric assays used to measure the doubling time  
241 of *M. florum* incubated at A) 30°C, B) 32°C, C) 34°C, D) 36°C, and E) 38°C. The dots and error  
242 bars represent the mean and standard deviation values obtained from three technical replicates.

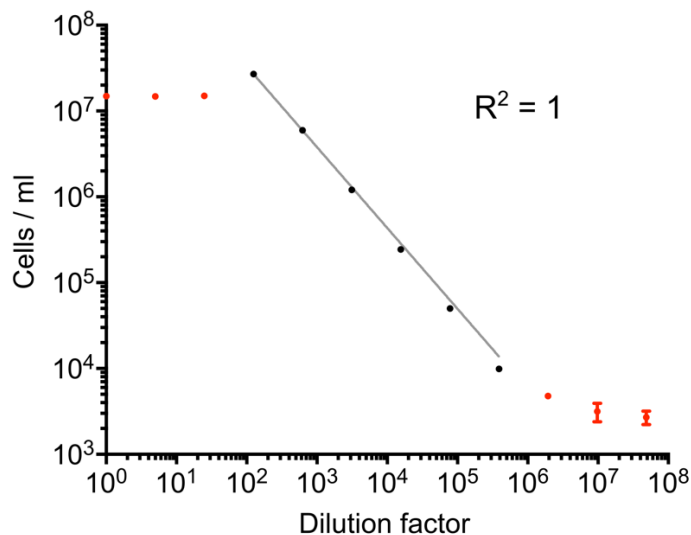

243  
 244 **Figure S2.** Relationship between *M. florum* cell concentrations measured by flow cytometry  
 245 (FCM) and culture dilutions performed in PBS1X. A log-log nonlinear regression is shown (gray  
 246 line), as well as the associated correlation coefficient ( $R^2$ ). Data points outside the nonlinear  
 247 regression are colored in red. The Dots and error bars represent the mean and standard deviation  
 248 values obtained from technical duplicates.

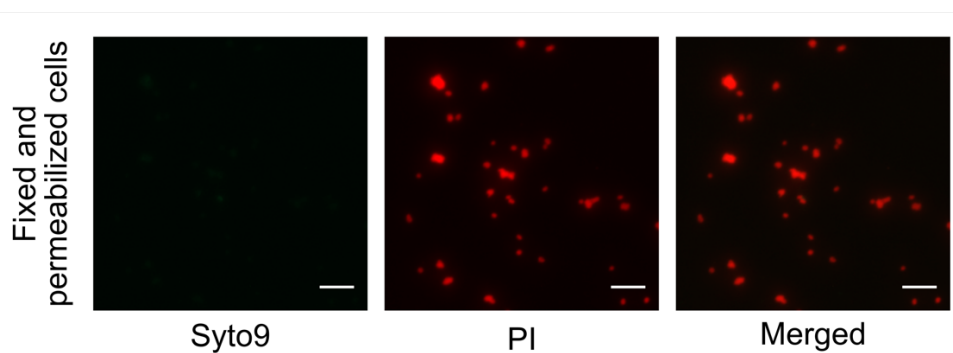

249  
 250 **Figure S3.** Representative image of fixed and permeabilized *M. florum* cells, double stained with  
 251 SYTO 9 and propidium iodide (PI), observed by widefield fluorescence microscopy.  
 252 Scale bar: 5  $\mu\text{m}$ .

253

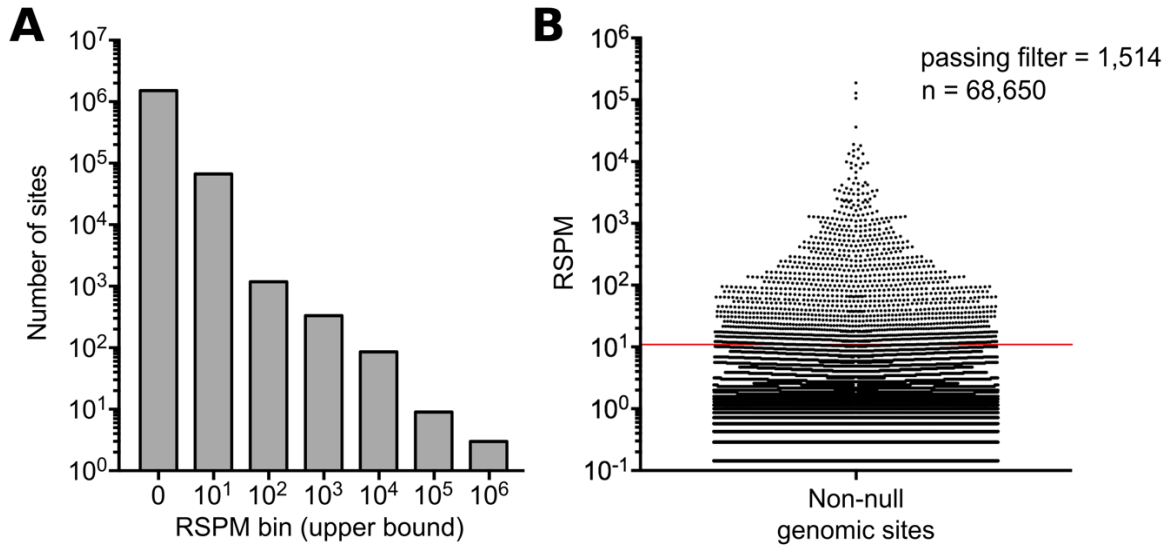

254

255 **Figure S4.** Analysis of 5'-RACE signal intensity. A) Frequency distribution of the 5'-RACE  
 256 signal intensity observed at each genomic position for both DNA strands. Signal intensity was  
 257 calculated according to the number of read starts per million of mapped reads (RSPM). RSPM bins  
 258 are log-scale, and the upper bound value of each bin is shown. B) RSPM signal intensity of all  
 259 non-null genomic positions (68,650 sites). The threshold value (10.92) used to discriminate  
 260 significant 5'-RACE peaks from background noise is shown by a red line (see Appendix Material  
 261 and Methods for further details). A total of 1,514 sites were considered significant.

262

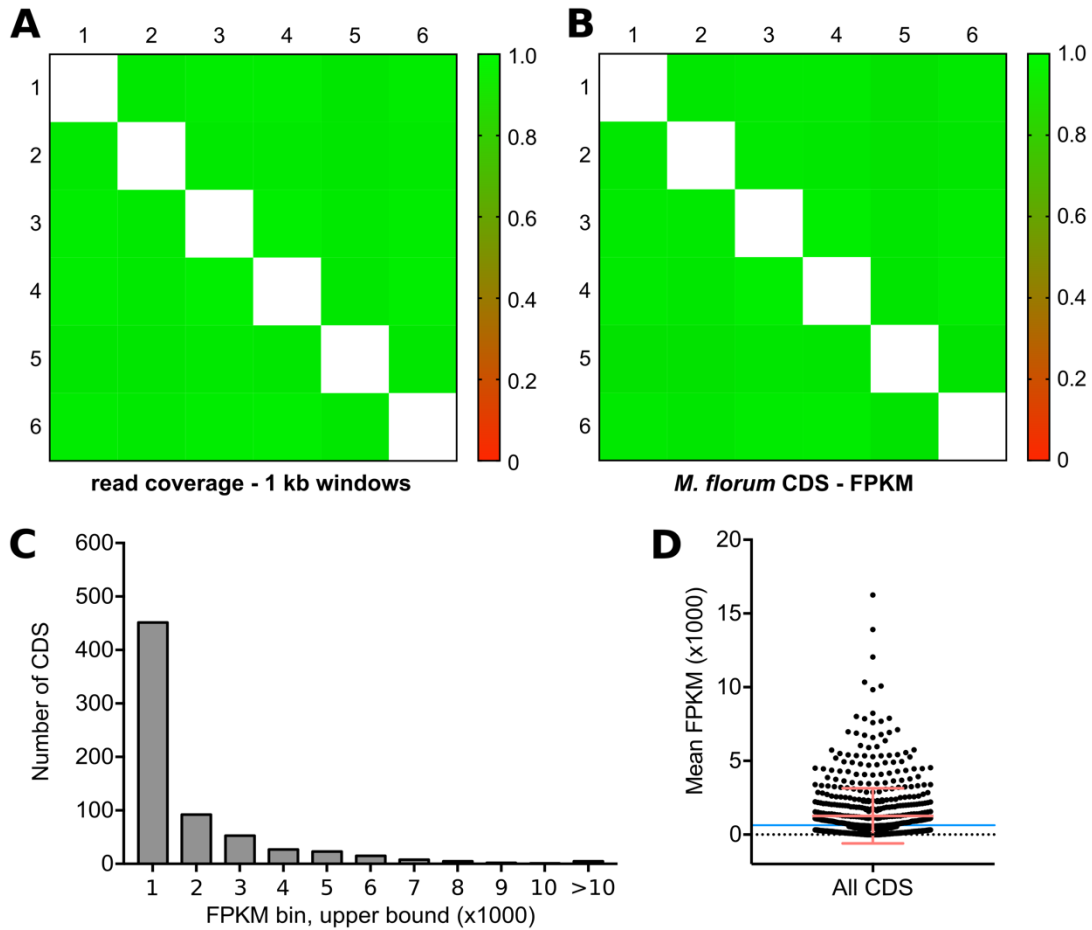

263

264 **Figure S5.** RNA-seq related correlations and distributions. A) Pearson correlation heatmap of  
 265 RNA-seq read coverage calculated from the different library replicates using non-overlapping 1 kb  
 266 windows. B) Same as A but using the number of fragments per kilobase per million of mapped  
 267 reads (FPKM) calculated for *M. florum* protein-coding gene (n=685). C) Frequency distribution  
 268 of the mean FPKM values of *M. florum* coding sequences (n=685). The upper bound value of each  
 269 FPKM bin is shown. D) Scatter plot showing the mean FPKM value calculated for each *M. florum*  
 270 coding sequence. The mean and corresponding SD are shown. The blue line indicates the  
 271 theoretical FPKM value obtained if all the reads were equally distributed across the genome  
 272 (FPKM=630).



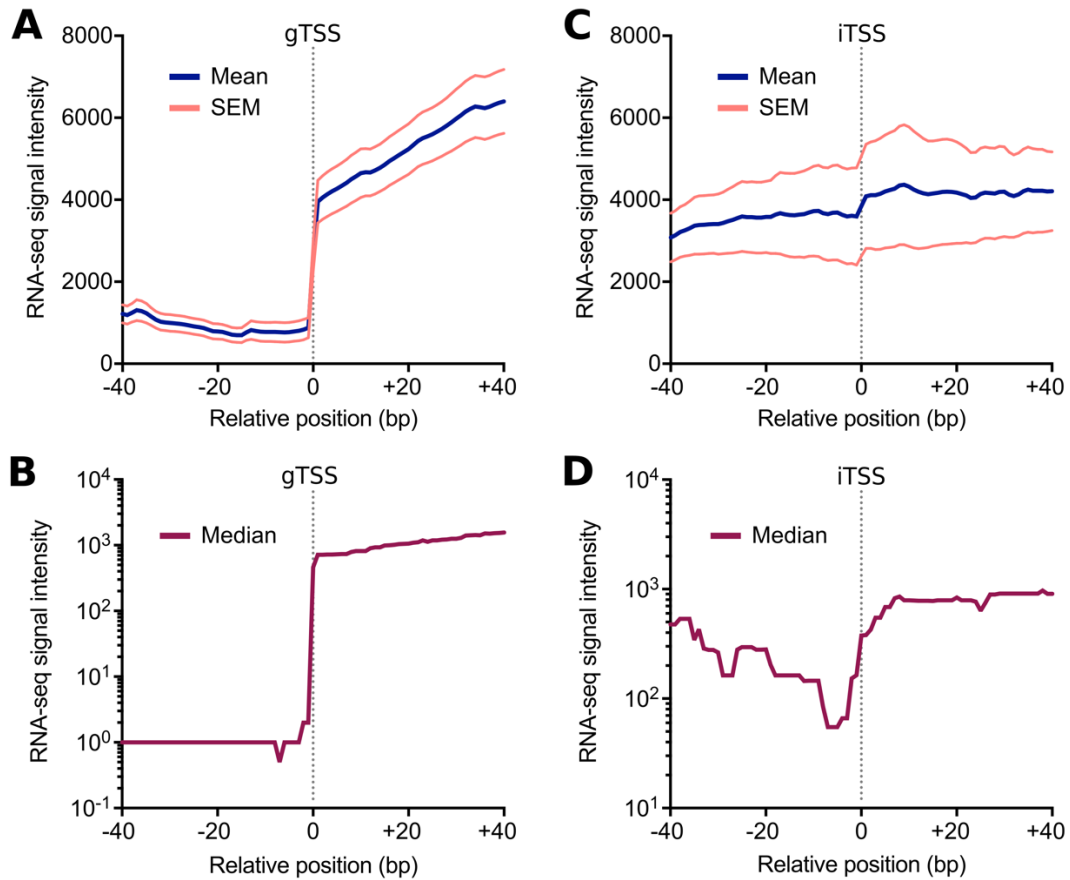

273

274 **Figure S6.** RNA-seq aggregate profiles of TSS types. A) Aggregate profile showing the mean  
 275 RNA-seq read coverage observed at and around all motif-associated gTSSs identified in this study.  
 276 The calculated SEM is also shown. The aggregate profile was centered on the gTSSs coordinates  
 277 (relative position 0 bp), indicated by a gray dashed line. B) Same as A but showing the median  
 278 value at each position instead of the mean and SEM. C) and D) Identical to A and B, but for motif-  
 279 associated iTSSs.

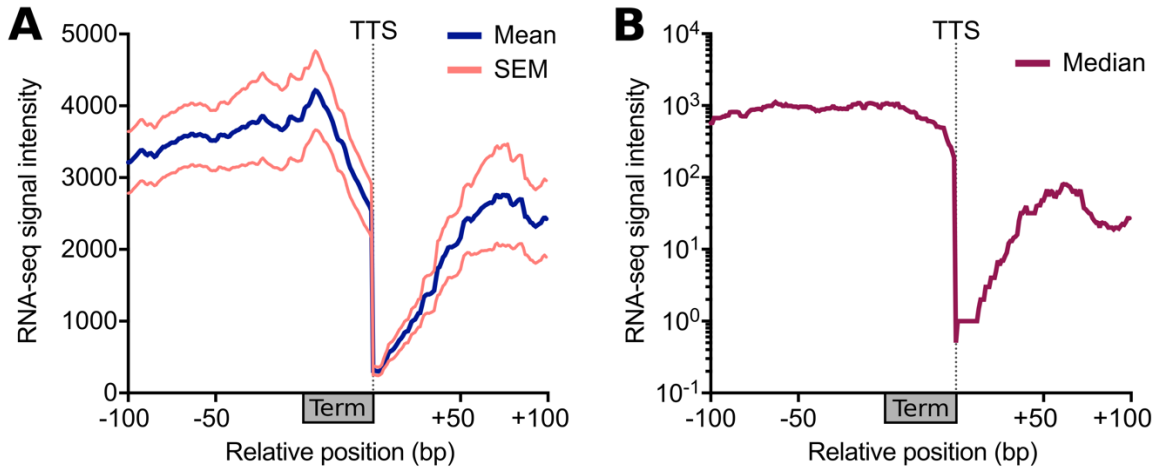

280

281 **Figure S7.** RNA-seq aggregate profiles of Rho-independent terminators predicted in this study.

282 A) Aggregate profile showing the mean RNA-seq read coverage observed for all predicted

283 terminators and their surrounding DNA regions. The calculated SEM is also shown. The aggregate

284 profile was centered on the terminators start and stop coordinates. The predicted transcription

285 termination site (TTS) is indicated by a gray dashed line. B) Same as A but showing the median

286 value at each position instead of the mean and SEM.

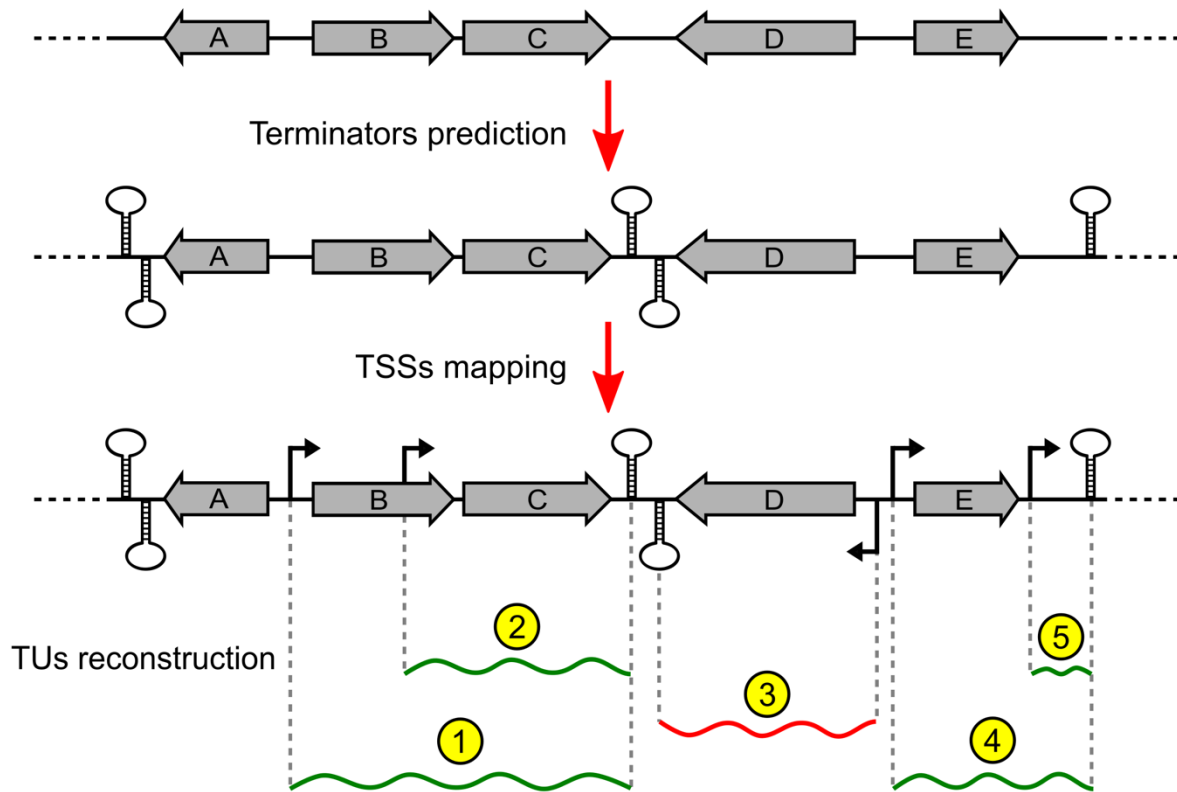

287

288 **Figure S8.** Summary of transcription unit reconstruction procedure. First, Rho-independent  
 289 terminators were predicted from the DNA sequence and genes annotation as described previously  
 290 (de Hoon *et al*, 2005), creating strand-specific term-to-term scaffolds. Motif-associated TSSs were  
 291 then mapped onto the scaffolds, and all possible transcription units (TUs) were reconstructed.  
 292 Depending on the context, some TUs may contain a single gene (TUs 2, 3, and 4), many genes  
 293 (TU 1), or no gene at all (TU 5; non-coding TU). Certain TUs may also partially overlap other  
 294 genes if they originate from iTSSs (TU 2). Genes not included in at least one TU and therefore not  
 295 associated with any TSS were classified as orphan genes (gene A).

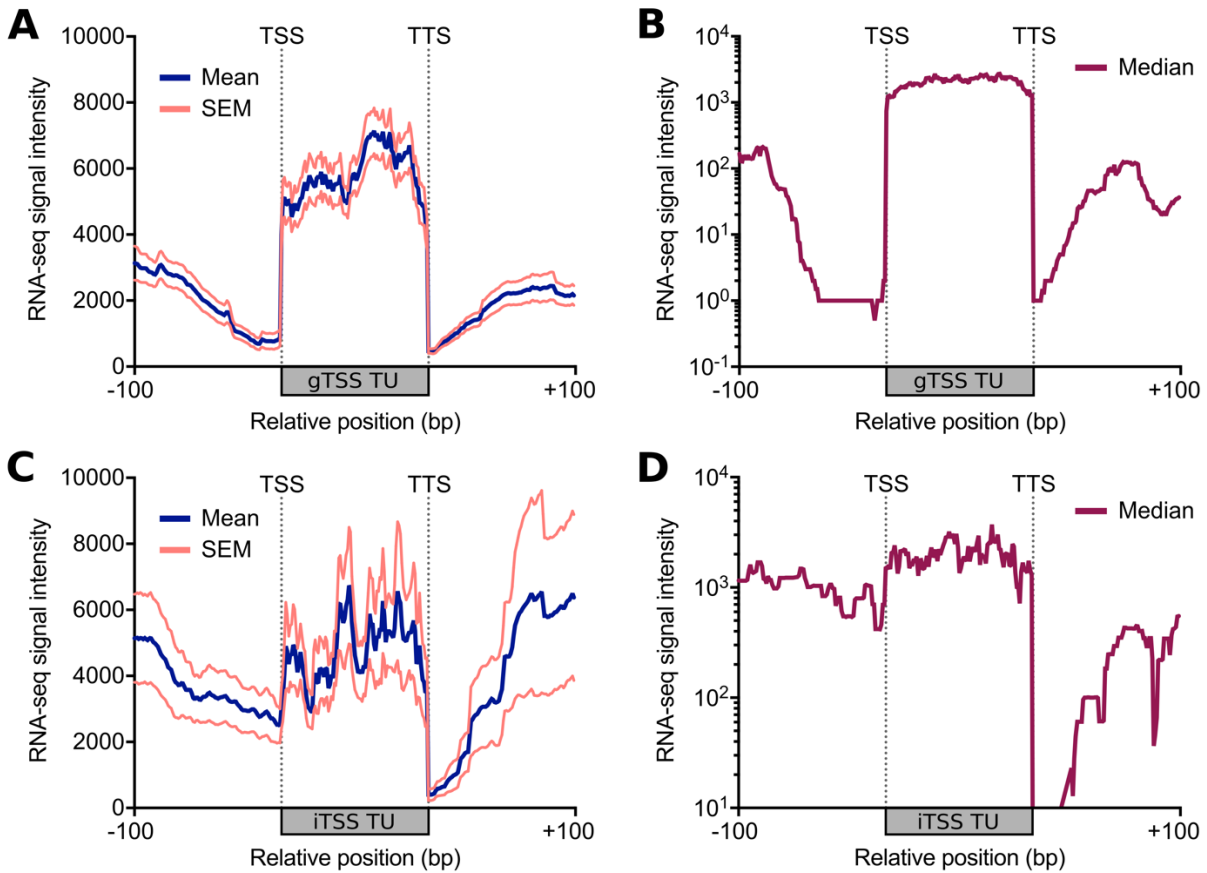

296

297 **Figure S9.** RNA-seq aggregate profiles of gTSS and iTSS transcription units (TUs). A) Aggregate  
 298 profile showing the mean RNA-seq read coverage observed for all gTSS TUs and their  
 299 surrounding DNA regions. The calculated SEM is also shown. The aggregate profile was centered  
 300 on the TUs start and stop coordinates, corresponding to transcription start site (TSS) and  
 301 termination site (TTS), respectively. B) Same as A but showing the median value at each position  
 302 instead of the mean and SEM. C) and D) Identical to A and B, but for iTSS TUs.

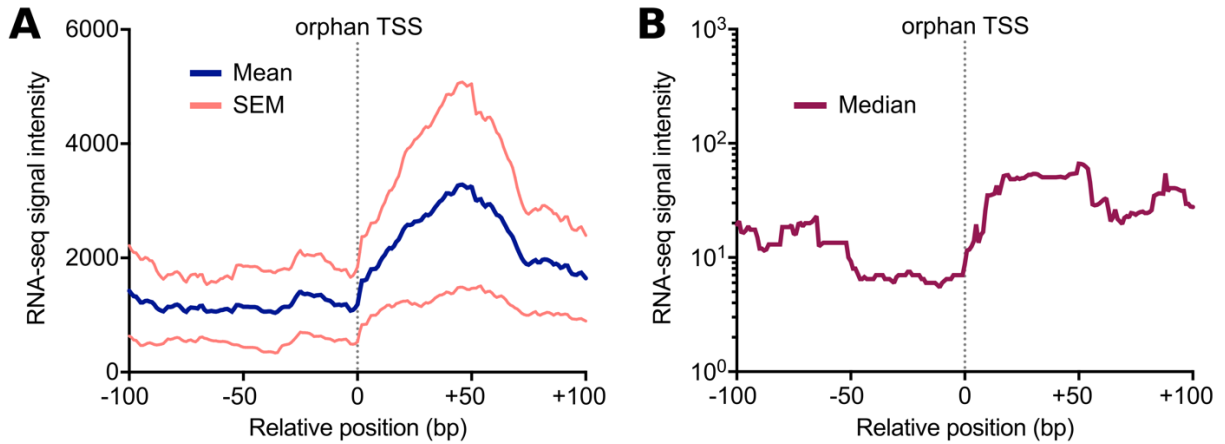

303  
 304 **Figure S10.** RNA-seq aggregate profiles of orphan TSSs and gTSSs located immediately upstream  
 305 a predicted terminator. A) Aggregate profile showing the mean RNA-seq read coverage and the  
 306 associated SEM values. The aggregate profile was centered on the TSSs coordinates (relative  
 307 position 0 bp), indicated by a gray dashed line. B) Same as A but showing the median value at  
 308 each position instead of the mean and SEM.

## 309 Supplementary Tables

310 **Table S1.** Statistical summary of Illumina sequencing libraries prepared in this study.

| Library type | Sequencing type | Replicate | Total reads (single) | Reads passing quality filters | Aligned reads (MAPQ $\geq$ 10) | Genome coverage |
|--------------|-----------------|-----------|----------------------|-------------------------------|--------------------------------|-----------------|
| 5'-RACE      | SE 40 bp        | 1         | 10,234,272           | 9,442,841 (92%)               | 6,961,595 (74%)                | ~350X           |
| RNAseq       | PE 50 bp        | 1         | 16,089,680           | 14,003,252 (87%)              | 13,049,819 (93%)               | ~820X           |
|              |                 | 2         | 16,531,090           | 14,234,385 (86%)              | 12,649,001 (89%)               | ~800X           |
|              |                 | 3         | 16,788,638           | 14,493,548 (86%)              | 13,605,303 (94%)               | ~860X           |
|              |                 | 4         | 17,389,570           | 15,067,903 (87%)              | 14,377,039 (95%)               | ~910X           |
|              |                 | 5         | 18,566,270           | 15,929,927 (86%)              | 14,980,959 (94%)               | ~940X           |
|              |                 | 6         | 15,247,438           | 13,105,485 (86%)              | 12,160,110 (93%)               | ~770X           |

311

312

## 313 **Supplementary References**

- 314 Bailey TL & Elkan C (1994) Fitting a mixture model by expectation maximization to discover  
315 motifs in biopolymers. *Proc Int Conf Intell Syst Mol Biol* 2: 28–36
- 316 Bailey TL & Gribskov M (1998) Combining evidence using p-values: application to sequence  
317 homology searches. *Bioinformatics* 14: 48–54
- 318 Bolger AM, Lohse M & Usadel B (2014) Trimmomatic: A flexible trimmer for Illumina sequence  
319 data. *Bioinformatics* 30: 2114–2120
- 320 Fahy E, Subramaniam S, Murphy RC, Nishijima M, Raetz CRH, Shimizu T, Spener F, van Meer  
321 G, Wakelam MJO & Dennis EA (2009) Update of the LIPID MAPS comprehensive  
322 classification system for lipids. *J Lipid Res* 50: S9–S14
- 323 de Hoon MJL, Makita Y, Nakai K & Miyano S (2005) Prediction of transcriptional terminators in  
324 *Bacillus subtilis* and related species. *PLoS Comput Biol* 1: e25
- 325 Langmead B & Salzberg SL (2012) Fast gapped-read alignment with Bowtie 2. *Nat Methods* 9:  
326 357–9
- 327 Li H, Handsaker B, Wysoker A, Fennell T, Ruan J, Homer N, Marth G, Abecasis G & Durbin R  
328 (2009) The Sequence Alignment/Map format and SAMtools. *Bioinformatics* 25: 2078–2079
- 329 Quinlan AR & Hall IM (2010) BEDTools: a flexible suite of utilities for comparing genomic  
330 features. *Bioinformatics* 26: 841–842
- 331
